# Supplementary material for: Key factors for high-quality eye care services via digital transformation of artificial intelligence: A qualitative study
Source: Research Square preprint supplement (doi:10.21203/rs.3.rs-7662029/v1), 2025-10-16
Supplement: Supplementary file 1 [file bd8000710eba1be7d5e175fe.docx]

**Appendix 1. Process of the main themes discussion**

These main themes reflected two key points of high-quality visual health management systems: ‘What to build, and how to build’.

Participants were first asked a series of general questions about their understanding of AI and using AI to deliver visual health services such as ‘What comes to mind when you think about AI and medicine?’ and ‘How does your institution apply AI to provide visual health services?’

Then, the interview continued on the impact of AI use on current eye disease service provision such as ‘What does AI make the change on the patient experience?’ and ‘What does AI make on the visual service provision?’

The focus group concluded with a broad discussion of the environmental support required for AI application in visual service provision, including tools support, policy support, platforms support, workforce support, and other conditions including questions such as ‘What software and hardware is required to use AI to provide visual health services, and whether there are difficulties and obstacles?’ and ‘What do you think are the platform requirements of using AI to build a visual health system?’
